# Supplementary material for: Poly(trimethylene carbonate) flexible intestinal anastomosis scaffolds to reduce the probability of intestinal fistula and obstruction
Source: Royal Society of Chemistry journal article supplement (doi:10.1039/d1tb00759a), 2021-01-01
Supplement: d1tb00759a1.pdf [file d1tb00759a1.pdf]

Poly(trimethylene carbonate) flexible intestinal anastomosis scaffolds to reduce the  
probability of intestinal fistula and obstruction

Yuehan Ren<sup>1, #</sup>, Xujian Li<sup>2, 3, #</sup>, Lei Wu<sup>4</sup>, Luqi Pan<sup>2, 3</sup>, Zhixiao Ji<sup>2, 3</sup>, Changcan Shi<sup>1, 2, 3</sup>,

\* Xiaodong Zhang<sup>1, \*</sup>

<sup>1</sup> Department of Colorectal anal surgery, The First Affiliated Hospital of Wenzhou  
Medical University, Wenzhou, Zhejiang, P.R. China

<sup>2</sup> Wenzhou Institute of Biomaterials and Engineering, Wenzhou Institute, University of  
Chinese Academy of Sciences, Wenzhou, Zhejiang 325011, China

<sup>3</sup> Oujiang Laboratory, Wenzhou, Zhejiang 325011, China

<sup>4</sup> School of Chemical Engineering and Technology, Tianjin University, Tianjin 300350,  
China

# Yuehan Ren and Xujian Li contributed equally to this work.

**Corresponding authors:**

Prof., Ph.D., Changcan Shi

Wenzhou Institute of Biomaterials and Engineering, Wenzhou Institute, University of  
Chinese Academy of Sciences, Wenzhou, Zhejiang 325011, China

E-mail: [shicc@ucas.ac.cn](mailto:shicc@ucas.ac.cn); Tel: +86-577-88017500

M.D., Xiaodong Zhang

Department of Colorectal anal surgery, The First Affiliated Hospital of Wenzhou  
Medical University, Wenzhou, Zhejiang, P.R. China

E-mail: [amostory007@126.com](mailto:amostory007@126.com); Tel:+86-577-55579472

The dried sample was dissolved in the mixed solution of chloroform/DMF (9/1, V/V). The concentration of the prepared solution was 5.5 (w/w) %. The prepared solution was placed in a 2.5 mL syringe containing a metal needle with an inner diameter of 0.5 mm. The specific electrospinning conditions were presented in Table S1<sup>[30]</sup>. The obtained fibers were further dried at room temperature for 24 h to remove residual organic solvents and moisture. The spun samples were used for mechanical properties testing and in vitro degradation test.

Table S1. Electrospinning conditions

| Needle push speed | Distance between needle and receiver | Roller speed | Voltage | Temperature | Humidity |
|-------------------|--------------------------------------|--------------|---------|-------------|----------|
| 1.0 mL/h          | 20 cm                                | 400 RMP      | 15 V    | 35 °C       | 25 %     |

Under the catalysis of  $\text{Sn}(\text{Oct})_2$ , PTMC was synthesized by ring-opening polymerization (Fig. S1).

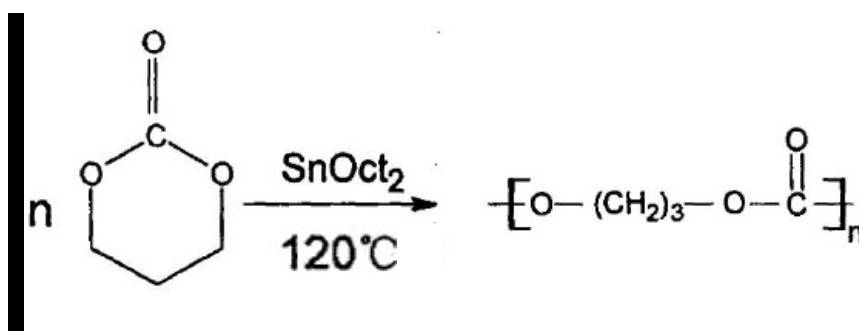

Figure S1. The synthesis process of PTMC.
